# Supplementary material for: Neuroprotection of Cholinergic Neurons with a Tau Aggregation Inhibitor and Rivastigmine in an Alzheimer’s-like Tauopathy Mouse Model
Source: MDPI journal article supplement (doi:10.3390/cells13070642), 2024-04-06
Supplement: s1 [file s1]

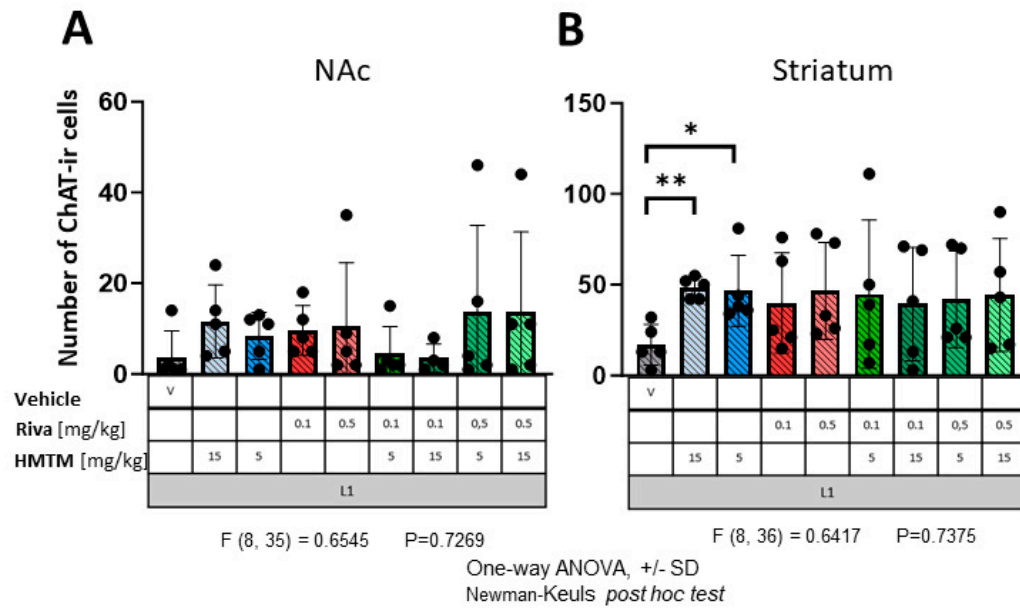

**Figure S1.** Choline acetyltransferase (ChAT) immunohistochemistry in the basal forebrain in L1 mice. Mean number of ChAT-ir interneurons in (A) the nucleus accumbens (NAc) and (B) striatum. Values expressed as mean  $\pm$  S.D. \*,  $p < 0.05$ ; \*\*,  $p < 0.01$ .

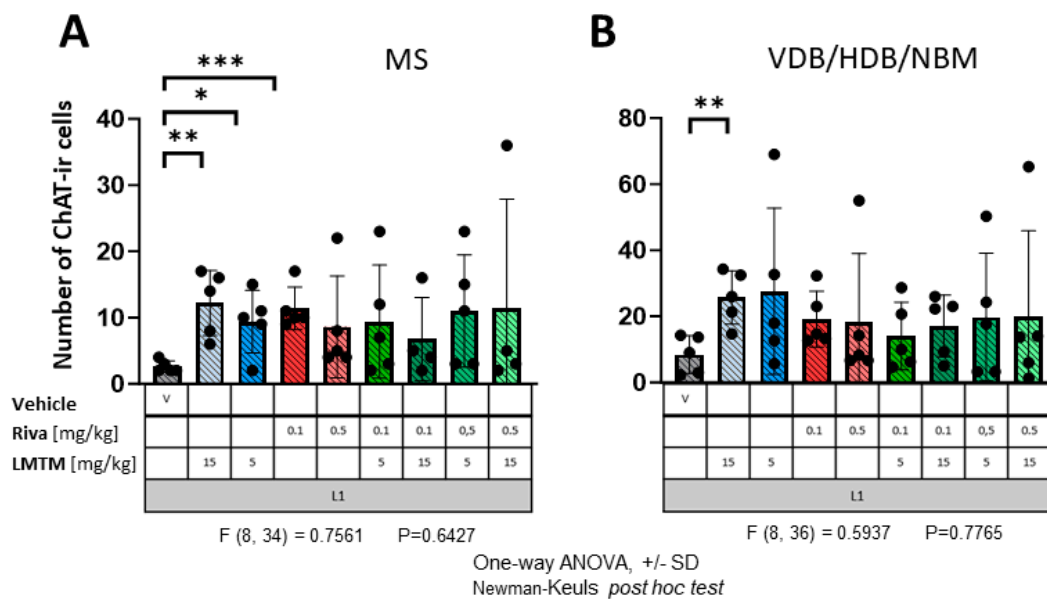

**Figure S2.** Choline acetyltransferase (ChAT) immunohistochemistry in the basal forebrain in L1 mice. Mean number of ChAT-ir interneurons in (A) the medial septum and (B) total number of neurons in the vertical (VDB) and horizontal (HDB) limb of the diagonal band of Broca and the magnocellular basal nucleus-substantia innominata (NBM). Values expressed as mean  $\pm$  S.D. \*,  $p < 0.05$ ; \*\*,  $p < 0.01$ ; \*\*\*,  $p < 0.001$ .

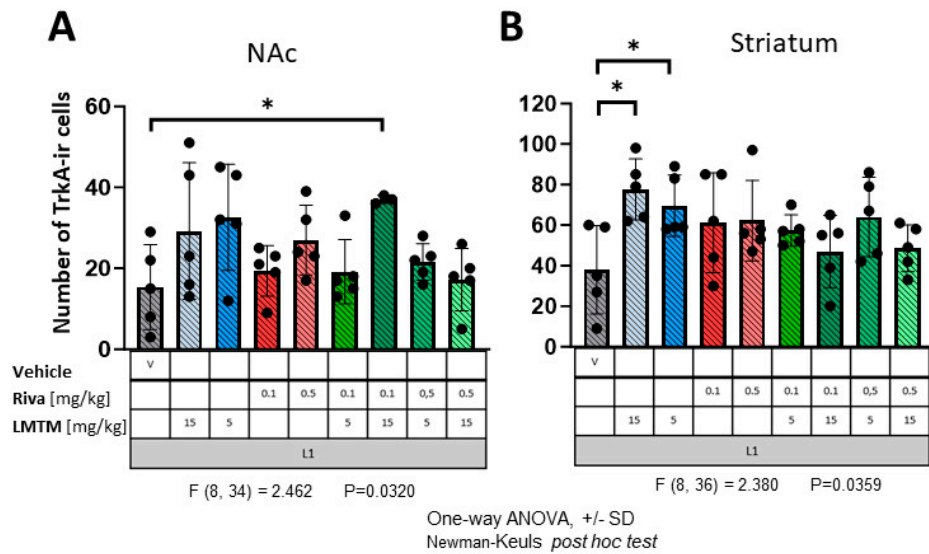

**Figure S3.** High affinity nerve growth factor receptor (TrkA) immunohistochemistry in the basal forebrain in L1 mice. Mean number of TrkA-ir interneurons in (A) the nucleus accumbens (NAc) and (B) striatum. Values expressed as mean  $\pm$  S.D. \*,  $p < 0.05$ .

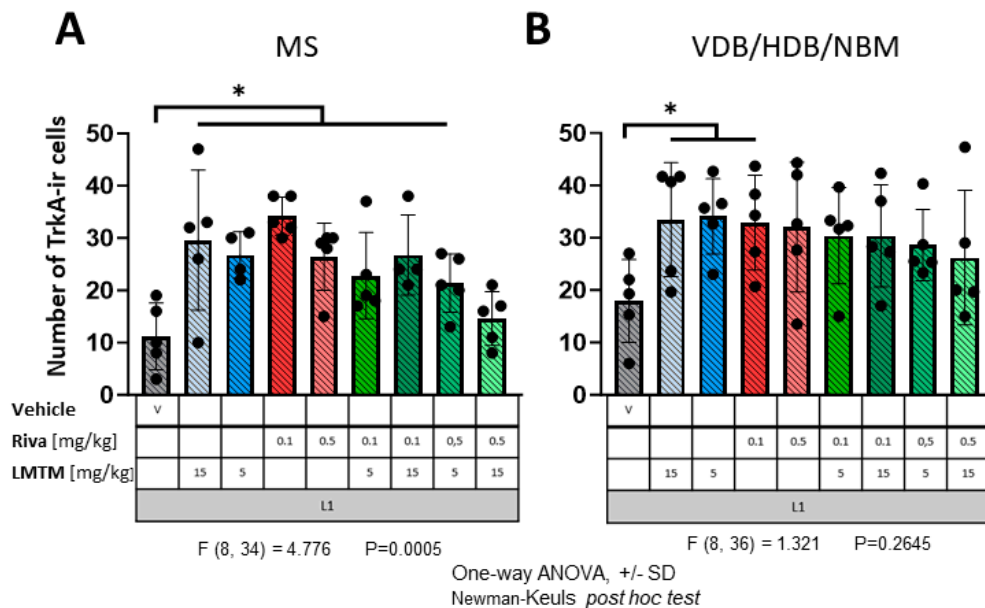

**Figure S4.** High-affinity nerve growth factor receptor (TrkA) immunohistochemistry in the basal forebrain in L1 mice. Mean number of TrkA-ir interneurons in (A) the medial septum and (B) total number of neurons in the vertical (VDB) and horizontal (HDB) limb of the diagonal band of Broca and the magnocellular basal nucleus-substantia innominata (NBM). Values expressed as mean  $\pm$  S.D. \*,  $p < 0.05$ .

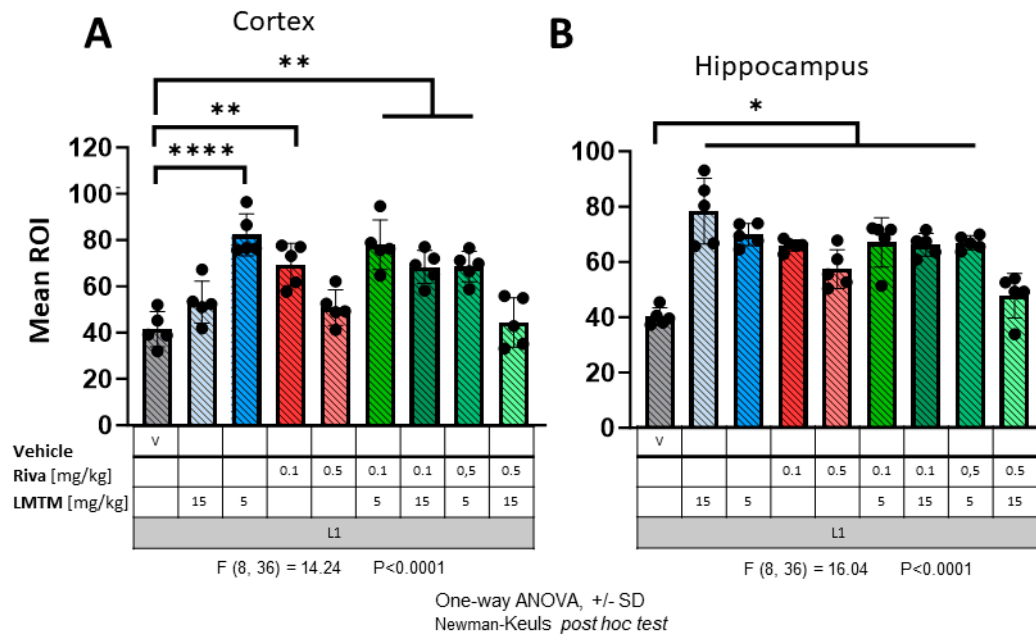

**Figure S5.** Vesicular acetylcholine transporter (VACHT) immunohistochemistry in L1 mice. Mean Relative Optical Density (Mean ROI) of VACHT staining in (A) motor cortex and (B) hippocampal CA3 field. Values expressed as mean  $\pm$  S.D. \*,  $p < 0.05$ ; \*\*,  $p < 0.01$ ; \*\*\*\*,  $p < 0.0001$

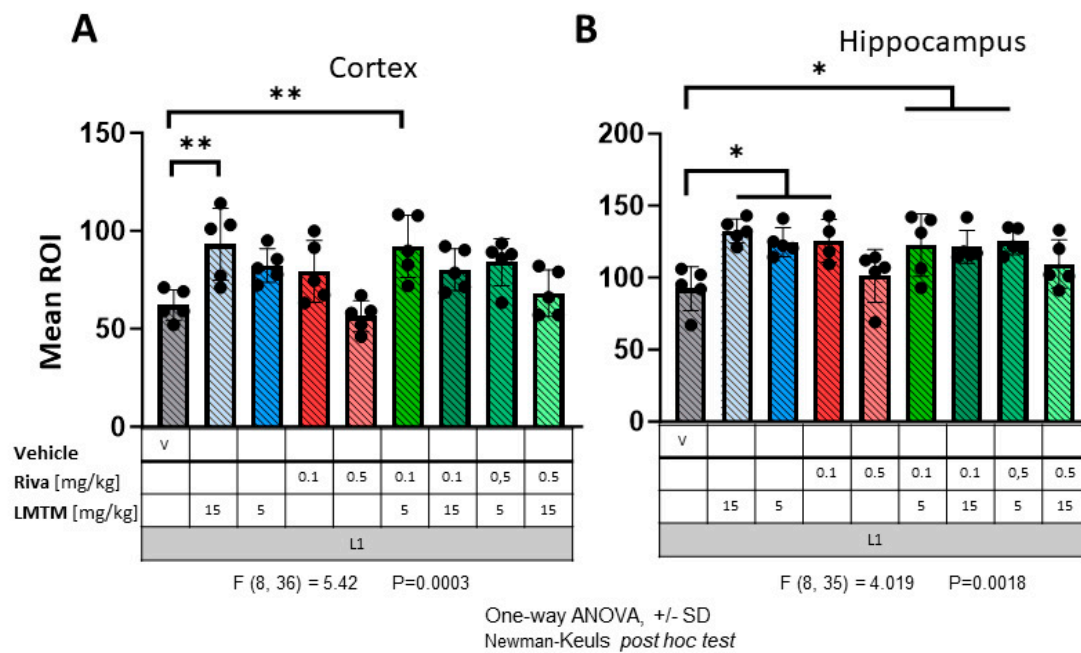

**Figure S6.** Acetylcholinesterase (AChE) in L1 mice. Mean Relative Optical Density (Mean ROI) of AChE staining in (A) motor cortex and (B) hippocampal CA3. Values expressed as mean  $\pm$  S.D. \*,  $p < 0.05$ ; \*\*,  $p < 0.01$ .

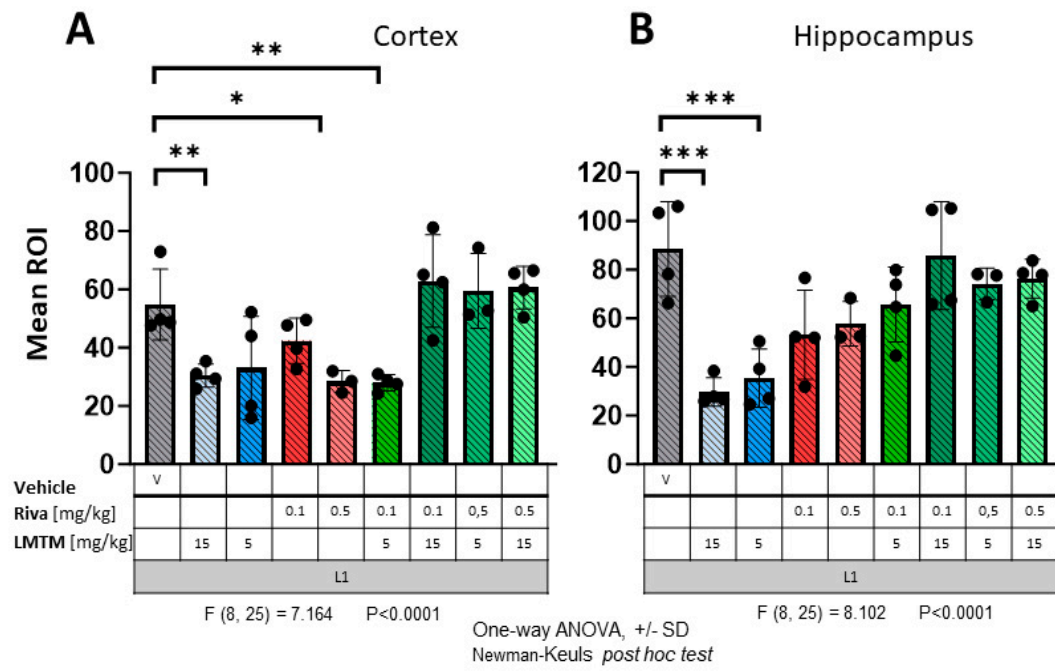

**Figure S7.** Tau immunohistochemistry, using S1D12, L1 mice. Mean Relative Optical Density (Mean ROI) of anti-tau staining in **(A)** motor cortex and **(B)** hippocampal CA3 field. Values expressed as mean  $\pm$  S.D. \*,  $p<0.05$ ; \*\*,  $p<0.01$ ; \*\*\*,  $p<0.001$ .
